# Supplementary material for: Gut Microbiome Alterations Precede Cerebral Amyloidosis and Microglial Pathology in a Mouse Model of Alzheimer’s Disease
Source: Hindawi journal article supplement (doi:10.1155/2020/8456596), 2020-01-01
Supplement: f1 [file 8456596.f1.pdf]

**Table S1. Primer sequences for amplification and sequencing of 16S rRNA genes**

| Forward Primer Linker |                    | Forward Primer        |                      | Read 1 Sequencing Primer                      |
|-----------------------|--------------------|-----------------------|----------------------|-----------------------------------------------|
| GT                    |                    | GTGCCAGCMGCCGCGGTAA   |                      | TATGGTAATTGTGTGCCAGCMGCCGCGGTAA               |
| Golay barcode         | Reverse Primer Pad | Reverse Primer Linker | Reverse Primer       | Primer For PCR                                |
| TCCCTTGCTCTCC         | AGTCAGTCAG         | CC                    | GGACTACHVGGGTWTCTAAT | TCCCTTGCTCTCCAGTCAGTCAGCCGGACTACHVGGGTWTCTAAT |
| ACGAGACTGATT          | AGTCAGTCAG         | CC                    | GGACTACHVGGGTWTCTAAT | ACGAGACTGATTAGTCAGTCAGCCGGACTACHVGGGTWTCTAAT  |
| GCTGTACGGATT          | AGTCAGTCAG         | CC                    | GGACTACHVGGGTWTCTAAT | GCTGTACGGATTAGTCAGTCAGCCGGACTACHVGGGTWTCTAAT  |
| ATCACCAGGTGT          | AGTCAGTCAG         | CC                    | GGACTACHVGGGTWTCTAAT | ATCACCAGGTGTAGTCAGTCAGCCGGACTACHVGGGTWTCTAAT  |
| TGGTCAACGATA          | AGTCAGTCAG         | CC                    | GGACTACHVGGGTWTCTAAT | TGGTCAACGATAAGTCAGTCAGCCGGACTACHVGGGTWTCTAAT  |
| ATCGCACAGTAA          | AGTCAGTCAG         | CC                    | GGACTACHVGGGTWTCTAAT | ATCGCACAGTAAAGTCAGTCAGCCGGACTACHVGGGTWTCTAAT  |
| GTCGTGTAGCCT          | AGTCAGTCAG         | CC                    | GGACTACHVGGGTWTCTAAT | GTCGTGTAGCCTAGTCAGTCAGCCGGACTACHVGGGTWTCTAAT  |
| AGCGGAGGITAG          | AGTCAGTCAG         | CC                    | GGACTACHVGGGTWTCTAAT | AGCGGAGGITAGAGTCAGTCAGCCGGACTACHVGGGTWTCTAAT  |
| ATCCTTTGGTTC          | AGTCAGTCAG         | CC                    | GGACTACHVGGGTWTCTAAT | ATCCTTTGGTTCAGTCAGTCAGCCGGACTACHVGGGTWTCTAAT  |
| TACAGCGCATA           | AGTCAGTCAG         | CC                    | GGACTACHVGGGTWTCTAAT | TACAGCGCATACAGTCAGTCAGCCGGACTACHVGGGTWTCTAAT  |
| ACCGGTATGTAC          | AGTCAGTCAG         | CC                    | GGACTACHVGGGTWTCTAAT | ACCGGTATGTACAGTCAGTCAGCCGGACTACHVGGGTWTCTAAT  |
| AATTGTGTCGGA          | AGTCAGTCAG         | CC                    | GGACTACHVGGGTWTCTAAT | AATTGTGTCGGAAGTCAGTCAGCCGGACTACHVGGGTWTCTAAT  |
| TGCATACTGG            | AGTCAGTCAG         | CC                    | GGACTACHVGGGTWTCTAAT | TGCATACTGGAGTCAGTCAGCCGGACTACHVGGGTWTCTAAT    |
| AGTCGAACGAGG          | AGTCAGTCAG         | CC                    | GGACTACHVGGGTWTCTAAT | AGTCGAACGAGGAGTCAGTCAGCCGGACTACHVGGGTWTCTAAT  |
| ACCAGTGACTCA          | AGTCAGTCAG         | CC                    | GGACTACHVGGGTWTCTAAT | ACCAGTGACTCAAGTCAGTCAGCCGGACTACHVGGGTWTCTAAT  |
| GAATACCAAGTC          | AGTCAGTCAG         | CC                    | GGACTACHVGGGTWTCTAAT | GAATACCAAGTCAGTCAGTCAGCCGGACTACHVGGGTWTCTAAT  |
| GTAGATCGTGTA          | AGTCAGTCAG         | CC                    | GGACTACHVGGGTWTCTAAT | GTAGATCGTGTAAGTCAGTCAGCCGGACTACHVGGGTWTCTAAT  |
| TAACGTGTGTGC          | AGTCAGTCAG         | CC                    | GGACTACHVGGGTWTCTAAT | TAACGTGTGTGCAGTCAGTCAGCCGGACTACHVGGGTWTCTAAT  |
| CATTATGGCGTG          | AGTCAGTCAG         | CC                    | GGACTACHVGGGTWTCTAAT | CATTATGGCGTGAGTCAGTCAGCCGGACTACHVGGGTWTCTAAT  |
| CCAATACGCCTG          | AGTCAGTCAG         | CC                    | GGACTACHVGGGTWTCTAAT | CCAATACGCCTGAGTCAGTCAGCCGGACTACHVGGGTWTCTAAT  |
| GATCTGCGATCC          | AGTCAGTCAG         | CC                    | GGACTACHVGGGTWTCTAAT | GATCTGCGATCCAGTCAGTCAGCCGGACTACHVGGGTWTCTAAT  |
| CAGCTCATCAGC          | AGTCAGTCAG         | CC                    | GGACTACHVGGGTWTCTAAT | CAGCTCATCAGCAGTCAGTCAGCCGGACTACHVGGGTWTCTAAT  |
| CAAACAACAGCT          | AGTCAGTCAG         | CC                    | GGACTACHVGGGTWTCTAAT | CAAACAACAGCTAGTCAGTCAGCCGGACTACHVGGGTWTCTAAT  |
| GCAACACCATCC          | AGTCAGTCAG         | CC                    | GGACTACHVGGGTWTCTAAT | GCAACACCATCCAGTCAGTCAGCCGGACTACHVGGGTWTCTAAT  |
| GCGATATATCGC          | AGTCAGTCAG         | CC                    | GGACTACHVGGGTWTCTAAT | GCGATATATCGCAGTCAGTCAGCCGGACTACHVGGGTWTCTAAT  |
| CGAGCAATCCTA          | AGTCAGTCAG         | CC                    | GGACTACHVGGGTWTCTAAT | CGAGCAATCCTAAGTCAGTCAGCCGGACTACHVGGGTWTCTAAT  |
| AGTCGTGCACAT          | AGTCAGTCAG         | CC                    | GGACTACHVGGGTWTCTAAT | AGTCGTGCACATAGTCAGTCAGCCGGACTACHVGGGTWTCTAAT  |
| GTATCTGCGCGT          | AGTCAGTCAG         | CC                    | GGACTACHVGGGTWTCTAAT | GTATCTGCGCGTAGTCAGTCAGCCGGACTACHVGGGTWTCTAAT  |
| CGAGGGAAAGTC          | AGTCAGTCAG         | CC                    | GGACTACHVGGGTWTCTAAT | CGAGGGAAAGTCAGTCAGTCAGCCGGACTACHVGGGTWTCTAAT  |
| CAAATTCGGGAT          | AGTCAGTCAG         | CC                    | GGACTACHVGGGTWTCTAAT | CAAATTCGGGATAGTCAGTCAGCCGGACTACHVGGGTWTCTAAT  |
| AGATTGACCAAC          | AGTCAGTCAG         | CC                    | GGACTACHVGGGTWTCTAAT | AGATTGACCAACAGTCAGTCAGCCGGACTACHVGGGTWTCTAAT  |
| AGTTACGAGCTA          | AGTCAGTCAG         | CC                    | GGACTACHVGGGTWTCTAAT | AGTTACGAGCTAAGTCAGTCAGCCGGACTACHVGGGTWTCTAAT  |
| GCATATGCACTG          | AGTCAGTCAG         | CC                    | GGACTACHVGGGTWTCTAAT | GCATATGCACTGAGTCAGTCAGCCGGACTACHVGGGTWTCTAAT  |
| CAACTCCCGTGA          | AGTCAGTCAG         | CC                    | GGACTACHVGGGTWTCTAAT | CAACTCCCGTGAAGTCAGTCAGCCGGACTACHVGGGTWTCTAAT  |
| TTGCGTTAGCAG          | AGTCAGTCAG         | CC                    | GGACTACHVGGGTWTCTAAT | TTGCGTTAGCAGAGTCAGTCAGCCGGACTACHVGGGTWTCTAAT  |
| TACGAGCCCTAA          | AGTCAGTCAG         | CC                    | GGACTACHVGGGTWTCTAAT | TACGAGCCCTAAAGTCAGTCAGCCGGACTACHVGGGTWTCTAAT  |
| CACTACGCTAGA          | AGTCAGTCAG         | CC                    | GGACTACHVGGGTWTCTAAT | CACTACGCTAGAAGTCAGTCAGCCGGACTACHVGGGTWTCTAAT  |
| TGCAGTCTCGA           | AGTCAGTCAG         | CC                    | GGACTACHVGGGTWTCTAAT | TGCAGTCTCGAAGTCAGTCAGCCGGACTACHVGGGTWTCTAAT   |
| ACCATAGCTCCG          | AGTCAGTCAG         | CC                    | GGACTACHVGGGTWTCTAAT | ACCATAGCTCCGAGTCAGTCAGCCGGACTACHVGGGTWTCTAAT  |

|               |            |    |                      |                                               |
|---------------|------------|----|----------------------|-----------------------------------------------|
| TCGACATCTCTT  | AGTCAGTCAG | CC | GGACTACHVGGGTWTCTAAT | TCGACATCTCTTAGTCAGTCAGCCGGACTACHVGGGTWTCTAAT  |
| GAACACTTTGGA  | AGTCAGTCAG | CC | GGACTACHVGGGTWTCTAAT | GAACACTTTGGAAGTCAGTCAGCCGGACTACHVGGGTWTCTAAT  |
| GAGCCATCTGTA  | AGTCAGTCAG | CC | GGACTACHVGGGTWTCTAAT | GAGCCATCTGTAAGTCAGTCAGCCGGACTACHVGGGTWTCTAAT  |
| TTGGGTACACGT  | AGTCAGTCAG | CC | GGACTACHVGGGTWTCTAAT | TTGGGTACACGTAGTCAGTCAGCCGGACTACHVGGGTWTCTAAT  |
| AAGGCGCTCCTT  | AGTCAGTCAG | CC | GGACTACHVGGGTWTCTAAT | AAGGCGCTCCTTAGTCAGTCAGCCGGACTACHVGGGTWTCTAAT  |
| TAATACGGATCG  | AGTCAGTCAG | CC | GGACTACHVGGGTWTCTAAT | TAATACGGATCGAGTCAGTCAGCCGGACTACHVGGGTWTCTAAT  |
| TCGGAATTAGAC  | AGTCAGTCAG | CC | GGACTACHVGGGTWTCTAAT | TCGGAATTAGACAGTCAGTCAGCCGGACTACHVGGGTWTCTAAT  |
| TGTGAATTCGGA  | AGTCAGTCAG | CC | GGACTACHVGGGTWTCTAAT | TGTGAATTCGGAAGTCAGTCAGCCGGACTACHVGGGTWTCTAAT  |
| CATTCGTGGCGT  | AGTCAGTCAG | CC | GGACTACHVGGGTWTCTAAT | CATTCGTGGCGTAGTCAGTCAGCCGGACTACHVGGGTWTCTAAT  |
| TACTACGTGGCC  | AGTCAGTCAG | CC | GGACTACHVGGGTWTCTAAT | TACTACGTGGCCAGTCAGTCAGCCGGACTACHVGGGTWTCTAAT  |
| GGCCAGTTCCTA  | AGTCAGTCAG | CC | GGACTACHVGGGTWTCTAAT | GGCCAGTTCCTAAGTCAGTCAGCCGGACTACHVGGGTWTCTAAT  |
| GATGTTCTGCTAG | AGTCAGTCAG | CC | GGACTACHVGGGTWTCTAAT | GATGTTCTGCTAGTCAGTCAGCCGGACTACHVGGGTWTCTAAT   |
| CTATCTCCTGTC  | AGTCAGTCAG | CC | GGACTACHVGGGTWTCTAAT | CTATCTCCTGTCAGTCAGTCAGCCGGACTACHVGGGTWTCTAAT  |
| ACTCACAGGAAT  | AGTCAGTCAG | CC | GGACTACHVGGGTWTCTAAT | ACTCACAGGAATAGTCAGTCAGCCGGACTACHVGGGTWTCTAAT  |
| ATGATGAGCCTC  | AGTCAGTCAG | CC | GGACTACHVGGGTWTCTAAT | ATGATGAGCCTCAGTCAGTCAGCCGGACTACHVGGGTWTCTAAT  |
| GTCGACAGAGGA  | AGTCAGTCAG | CC | GGACTACHVGGGTWTCTAAT | GTCGACAGAGGAAGTCAGTCAGCCGGACTACHVGGGTWTCTAAT  |
| TGTCGCAAATAG  | AGTCAGTCAG | CC | GGACTACHVGGGTWTCTAAT | TGTCGCAAATAGAGTCAGTCAGCCGGACTACHVGGGTWTCTAAT  |
| CATCCCTCTACT  | AGTCAGTCAG | CC | GGACTACHVGGGTWTCTAAT | CATCCCTCTACTAGTCAGTCAGCCGGACTACHVGGGTWTCTAAT  |
| TATACCGTCTGCG | AGTCAGTCAG | CC | GGACTACHVGGGTWTCTAAT | TATACCGTCTGCGAGTCAGTCAGCCGGACTACHVGGGTWTCTAAT |
| AGTTGAGGCATT  | AGTCAGTCAG | CC | GGACTACHVGGGTWTCTAAT | AGTTGAGGCATTAGTCAGTCAGCCGGACTACHVGGGTWTCTAAT  |
| ACAATAGACACC  | AGTCAGTCAG | CC | GGACTACHVGGGTWTCTAAT | ACAATAGACACCAGTCAGTCAGCCGGACTACHVGGGTWTCTAAT  |
| CGGTCAATTGAC  | AGTCAGTCAG | CC | GGACTACHVGGGTWTCTAAT | CGGTCAATTGACAGTCAGTCAGCCGGACTACHVGGGTWTCTAAT  |
| GTGGAGTCTCAT  | AGTCAGTCAG | CC | GGACTACHVGGGTWTCTAAT | GTGGAGTCTCATAGTCAGTCAGCCGGACTACHVGGGTWTCTAAT  |
| GCTCGAAGATT   | AGTCAGTCAG | CC | GGACTACHVGGGTWTCTAAT | GCTCGAAGATTAGTCAGTCAGCCGGACTACHVGGGTWTCTAAT   |
| AGGCTTACGTGT  | AGTCAGTCAG | CC | GGACTACHVGGGTWTCTAAT | AGGCTTACGTGTAGTCAGTCAGCCGGACTACHVGGGTWTCTAAT  |
| TCTCTACCACTC  | AGTCAGTCAG | CC | GGACTACHVGGGTWTCTAAT | TCTCTACCACTCAGTCAGTCAGCCGGACTACHVGGGTWTCTAAT  |
| ACTTCCAACTTC  | AGTCAGTCAG | CC | GGACTACHVGGGTWTCTAAT | ACTTCCAACTTCAGTCAGTCAGCCGGACTACHVGGGTWTCTAAT  |
| CTCACCTAGGAA  | AGTCAGTCAG | CC | GGACTACHVGGGTWTCTAAT | CTCACCTAGGAAAGTCAGTCAGCCGGACTACHVGGGTWTCTAAT  |
| GTGTTGTCGTGC  | AGTCAGTCAG | CC | GGACTACHVGGGTWTCTAAT | GTGTTGTCGTGCAGTCAGTCAGCCGGACTACHVGGGTWTCTAAT  |
| CCACAGATCGAT  | AGTCAGTCAG | CC | GGACTACHVGGGTWTCTAAT | CCACAGATCGATAGTCAGTCAGCCGGACTACHVGGGTWTCTAAT  |
| TATCGACACAAG  | AGTCAGTCAG | CC | GGACTACHVGGGTWTCTAAT | TATCGACACAAGAGTCAGTCAGCCGGACTACHVGGGTWTCTAAT  |
| GATTCGGCTCA   | AGTCAGTCAG | CC | GGACTACHVGGGTWTCTAAT | GATTCGGCTCAAGTCAGTCAGCCGGACTACHVGGGTWTCTAAT   |
| CGTAATTGCCGC  | AGTCAGTCAG | CC | GGACTACHVGGGTWTCTAAT | CGTAATTGCCGCAGTCAGTCAGCCGGACTACHVGGGTWTCTAAT  |
| GGTGACTAGTTC  | AGTCAGTCAG | CC | GGACTACHVGGGTWTCTAAT | GGTGACTAGTTCAGTCAGTCAGCCGGACTACHVGGGTWTCTAAT  |
| ATGGGTTCCGTC  | AGTCAGTCAG | CC | GGACTACHVGGGTWTCTAAT | ATGGGTTCCGTCAGTCAGTCAGCCGGACTACHVGGGTWTCTAAT  |
| TAGGCATGCTTG  | AGTCAGTCAG | CC | GGACTACHVGGGTWTCTAAT | TAGGCATGCTTGAGTCAGTCAGCCGGACTACHVGGGTWTCTAAT  |
| AACTAGTTCAGG  | AGTCAGTCAG | CC | GGACTACHVGGGTWTCTAAT | AACTAGTTCAGGAGTCAGTCAGCCGGACTACHVGGGTWTCTAAT  |
| ATTCTGCCGAAG  | AGTCAGTCAG | CC | GGACTACHVGGGTWTCTAAT | ATTCTGCCGAAGAGTCAGTCAGCCGGACTACHVGGGTWTCTAAT  |
| AGCATGTCCCGT  | AGTCAGTCAG | CC | GGACTACHVGGGTWTCTAAT | AGCATGTCCCGTAGTCAGTCAGCCGGACTACHVGGGTWTCTAAT  |
| GTACGATATGAC  | AGTCAGTCAG | CC | GGACTACHVGGGTWTCTAAT | GTACGATATGACAGTCAGTCAGCCGGACTACHVGGGTWTCTAAT  |
| GTGGTGGTTTCC  | AGTCAGTCAG | CC | GGACTACHVGGGTWTCTAAT | GTGGTGGTTTCCAGTCAGTCAGCCGGACTACHVGGGTWTCTAAT  |
| TAGTATGCGCAA  | AGTCAGTCAG | CC | GGACTACHVGGGTWTCTAAT | TAGTATGCGCAAAGTCAGTCAGCCGGACTACHVGGGTWTCTAAT  |
| TGCGCTGAATGT  | AGTCAGTCAG | CC | GGACTACHVGGGTWTCTAAT | TGCGCTGAATGTAGTCAGTCAGCCGGACTACHVGGGTWTCTAAT  |
| ATGGCTGTCAGT  | AGTCAGTCAG | CC | GGACTACHVGGGTWTCTAAT | ATGGCTGTCAGTAGTCAGTCAGCCGGACTACHVGGGTWTCTAAT  |

|               |            |    |                      |                                               |
|---------------|------------|----|----------------------|-----------------------------------------------|
| GTTCTCTTCTCG  | AGTCAGTCAG | CC | GGACTACHVGGGTWTCTAAT | GTTCTCTTCTCGAGTCAGTCAGCCGGACTACHVGGGTWTCTAAT  |
| CGTAAGATGCCT  | AGTCAGTCAG | CC | GGACTACHVGGGTWTCTAAT | CGTAAGATGCCTAGTCAGTCAGCCGGACTACHVGGGTWTCTAAT  |
| GCGTTCTAGCTG  | AGTCAGTCAG | CC | GGACTACHVGGGTWTCTAAT | GCGTTCTAGCTGAGTCAGTCAGCCGGACTACHVGGGTWTCTAAT  |
| GTTGTTCTGGGA  | AGTCAGTCAG | CC | GGACTACHVGGGTWTCTAAT | GTTGTTCTGGGAAGTCAGTCAGCCGGACTACHVGGGTWTCTAAT  |
| GGACTTCCAGCT  | AGTCAGTCAG | CC | GGACTACHVGGGTWTCTAAT | GGACTTCCAGCTAGTCAGTCAGCCGGACTACHVGGGTWTCTAAT  |
| CTCACAACCGTG  | AGTCAGTCAG | CC | GGACTACHVGGGTWTCTAAT | CTCACAACCGTGAGTCAGTCAGCCGGACTACHVGGGTWTCTAAT  |
| CTGCTATTCCCTC | AGTCAGTCAG | CC | GGACTACHVGGGTWTCTAAT | CTGCTATTCCCTCAGTCAGTCAGCCGGACTACHVGGGTWTCTAAT |
| ATGTCACCGCTG  | AGTCAGTCAG | CC | GGACTACHVGGGTWTCTAAT | ATGTCACCGCTGAGTCAGTCAGCCGGACTACHVGGGTWTCTAAT  |
| TGTAACGCCGAT  | AGTCAGTCAG | CC | GGACTACHVGGGTWTCTAAT | TGTAACGCCGATAGTCAGTCAGCCGGACTACHVGGGTWTCTAAT  |
| AGCAGAACATCT  | AGTCAGTCAG | CC | GGACTACHVGGGTWTCTAAT | AGCAGAACATCTAGTCAGTCAGCCGGACTACHVGGGTWTCTAAT  |
| TGGAGTAGGTGG  | AGTCAGTCAG | CC | GGACTACHVGGGTWTCTAAT | TGGAGTAGGTGGAGTCAGTCAGCCGGACTACHVGGGTWTCTAAT  |
| TTGGCTCTATTC  | AGTCAGTCAG | CC | GGACTACHVGGGTWTCTAAT | TTGGCTCTATTCAGTCAGTCAGCCGGACTACHVGGGTWTCTAAT  |
| GATCCCACGTAC  | AGTCAGTCAG | CC | GGACTACHVGGGTWTCTAAT | GATCCCACGTACAGTCAGTCAGCCGGACTACHVGGGTWTCTAAT  |
| TACCGCTTCTTC  | AGTCAGTCAG | CC | GGACTACHVGGGTWTCTAAT | TACCGCTTCTTCAGTCAGTCAGCCGGACTACHVGGGTWTCTAAT  |
| TGTGCGATAACA  | AGTCAGTCAG | CC | GGACTACHVGGGTWTCTAAT | TGTGCGATAACAAGTCAGTCAGCCGGACTACHVGGGTWTCTAAT  |
| GATTATCGACGA  | AGTCAGTCAG | CC | GGACTACHVGGGTWTCTAAT | GATTATCGACGAAGTCAGTCAGCCGGACTACHVGGGTWTCTAAT  |
| GCCTAGCCCAAT  | AGTCAGTCAG | CC | GGACTACHVGGGTWTCTAAT | GCCTAGCCCAATAGTCAGTCAGCCGGACTACHVGGGTWTCTAAT  |
| GATGTATGTGGT  | AGTCAGTCAG | CC | GGACTACHVGGGTWTCTAAT | GATGTATGTGGTAGTCAGTCAGCCGGACTACHVGGGTWTCTAAT  |

---

Table S2. Significantly different taxa between WT and AD mice at phylum, family and genus level.

| Taxon                                 | Occupancy<br>(%; Mean $\pm$ SD) |                   | Fold<br>change |
|---------------------------------------|---------------------------------|-------------------|----------------|
|                                       | WT                              | APP/PS1           |                |
| <b>1-month-old</b>                    |                                 |                   |                |
| <i>f__Enterobacteriaceae</i>          | 0.01 $\pm$ 0.01                 | 0.80 $\pm$ 3.57   | ↑ 132.9        |
| <b>2-month-old</b>                    |                                 |                   |                |
| <i>p__Verrucomicrobia</i>             | 0.02 $\pm$ 0.04                 | 0.26 $\pm$ 0.66   | ↑ 15.1         |
| <i>f__Verrucomicrobiaceae</i>         | 0.02 $\pm$ 0.04                 | 0.26 $\pm$ 0.66   | ↑ 15.1         |
| <i>g__Akkermansia</i>                 | 0.02 $\pm$ 0.04                 | 0.26 $\pm$ 0.66   | ↑ 15.1         |
| <i>f__Prevotellaceae</i>              | 0.01 $\pm$ 0.02                 | 0.71 $\pm$ 1.79   | ↑ 56.0         |
| <i>g__Prevotellaceae_UCG-001</i>      | 0.01 $\pm$ 0.02                 | 0.68 $\pm$ 1.74   | ↑ 55.9         |
| <i>g__Alloprevotella</i>              | 0.000 $\pm$ 0.001               | 0.025 $\pm$ 0.050 | ↑ 52.0         |
| <i>p__Actinobacteria</i>              | 0.50 $\pm$ 0.43                 | 1.37 $\pm$ 1.26   | ↑ 2.7          |
| <i>f__Bifidobacteriaceae</i>          | 0.44 $\pm$ 0.42                 | 1.24 $\pm$ 1.29   | ↑ 2.8          |
| <i>g__Bifidobacterium</i>             | 0.44 $\pm$ 0.42                 | 1.24 $\pm$ 1.29   | ↑ 2.8          |
| <i>f__Erysipelotrichaceae</i>         | 0.03 $\pm$ 0.03                 | 0.07 $\pm$ 0.09   | ↑ 2.5          |
| <i>g__Allobaculum</i>                 | 0.001 $\pm$ 0.002               | 0.039 $\pm$ 0.097 | ↑ 39.4         |
| <i>g__Erysipelatoclostridium</i>      | 0.007 $\pm$ 0.010               | 0.010 $\pm$ 0.007 | ↑ 1.6          |
| <b>3-month-old</b>                    |                                 |                   |                |
| <i>g__Lachnospiraceae_UCG-001</i>     | 1.38 $\pm$ 1.91                 | 4.07 $\pm$ 5.24   | ↑ 3.0          |
| <i>g__Ruminiclostridium_5</i>         | 0.15 $\pm$ 0.11                 | 0.08 $\pm$ 0.05   | ↓ -1.7         |
| <i>g__Ruminococcaceae_UCG-010</i>     | 0.02 $\pm$ 0.01                 | 0.01 $\pm$ 0.01   | ↓ -1.7         |
| <b>6-month-old</b>                    |                                 |                   |                |
| <i>p__Verrucomicrobia</i>             | 0.08 $\pm$ 0.23                 | 0.35 $\pm$ 0.86   | ↑ 4.4          |
| <i>f__Verrucomicrobiaceae</i>         | 0.08 $\pm$ 0.23                 | 0.35 $\pm$ 0.86   | ↑ 4.4          |
| <i>g__Akkermansia</i>                 | 0.08 $\pm$ 0.23                 | 0.35 $\pm$ 0.86   | ↑ 4.4          |
| <i>f__Bacteroidaceae</i>              | 1.18 $\pm$ 1.57                 | 0.36 $\pm$ 0.30   | ↓ -3.3         |
| <i>g__Bacteroides</i>                 | 1.18 $\pm$ 1.57                 | 0.36 $\pm$ 0.30   | ↓ -3.3         |
| <i>f__Rikenellaceae</i>               | 3.15 $\pm$ 2.36                 | 1.88 $\pm$ 1.62   | ↓ -1.7         |
| <i>g__Rikenellaceae_RC9_gut_group</i> | 2.65 $\pm$ 2.26                 | 1.47 $\pm$ 1.32   | ↓ -1.8         |
| <i>f__Enterobacteriaceae</i>          | 0.008 $\pm$ 0.012               | 0.049 $\pm$ 0.152 | ↑ 6.0          |
| <i>g__Escherichia_Shigella</i>        | 0.008 $\pm$ 0.012               | 0.049 $\pm$ 0.152 | ↑ 6.0          |
| <i>g__Blautia</i>                     | 0.08 $\pm$ 0.07                 | 0.16 $\pm$ 0.16   | ↑ 2.0          |
| <i>g__Tyzzerella</i>                  | 0.008 $\pm$ 0.006               | 0.014 $\pm$ 0.010 | ↑ 1.8          |
| <i>g__Family_XIII_UCG-001</i>         | 0.01 $\pm$ 0.01                 | 0.02 $\pm$ 0.02   | ↑ 1.6          |
| <i>g__Turicibacter</i>                | 0.001 $\pm$ 0.002               | 0.052 $\pm$ 0.099 | ↑ 74.6         |
| <i>g__Unclassified</i>                | 1.25 $\pm$ 1.11                 | 2.19 $\pm$ 1.64   | ↑ 1.8          |
| <b>9-month-old</b>                    |                                 |                   |                |
| <i>p__Verrucomicrobia</i>             | 0.24 $\pm$ 0.93                 | 1.46 $\pm$ 5.58   | ↑ 6.1          |
| <i>f__Verrucomicrobiaceae</i>         | 0.24 $\pm$ 0.93                 | 1.46 $\pm$ 5.58   | ↑ 6.1          |
| <i>g__Akkermansia</i>                 | 0.24 $\pm$ 0.93                 | 1.46 $\pm$ 5.58   | ↑ 6.1          |
| <i>p__Proteobacteria</i>              | 0.94 $\pm$ 0.65                 | 1.70 $\pm$ 1.09   | ↑ 1.8          |

|                                                                 |              |              |   |      |
|-----------------------------------------------------------------|--------------|--------------|---|------|
| <i>f__Desulfovibrionaceae</i>                                   | 0.59 ±0.60   | 1.06 ±0.77   | ↑ | 1.8  |
| <i>g__Desulfovibrio</i>                                         | 0.59 ±0.60   | 1.06 ±0.77   | ↑ | 1.8  |
| <i>f__Clostridiales_vadinBB60_group</i>                         | 0.44 ±0.31   | 1.15 ±0.99   | ↑ | 2.6  |
| <i>g__uncultured_bacterium_f__Clostridiales_vadinBB60_group</i> | 0.42 ±0.30   | 1.14 ±0.98   | ↑ | 2.7  |
| <i>g__Lachnospiraceae_UCG-001</i>                               | 0.98 ±1.90   | 1.96 ±3.13   | ↑ | 2.0  |
| <i>g__Lachnospiraceae_UCG-006</i>                               | 0.105 ±0.073 | 0.067 ±0.068 | ↓ | -1.6 |
| <i>g__Ruminococcus_1</i>                                        | 0.015 ±0.026 | 0.058 ±0.075 | ↑ | 3.8  |
| <i>g__[Eubacterium]_nodatum_group</i>                           | 0.011 ±0.008 | 0.006 ±0.004 | ↓ | -2.0 |
| <i>f__Carnobacteriaceae</i>                                     | 0.028 ±0.067 | 0.005 ±0.013 | ↓ | -5.7 |
| <i>g__Atopostipes</i>                                           | 0.028 ±0.067 | 0.005 ±0.013 | ↓ | -5.7 |
| <i>g__Alistipes</i>                                             | 0.41 ±0.35   | 0.26 ±0.32   | ↓ | -1.6 |
| <i>f__Unclassified</i>                                          | 0.25 ±0.38   | 0.78 ±0.88   | ↑ | 3.1  |
| <i>g__Unclassified</i>                                          | 1.08 ±1.01   | 2.22 ±1.45   | ↑ | 2.0  |

The percent compositions of microbiomes at the level of phylum, family and genus, for which occupancy differed in APP/PS1 mice as compared to WT controls. Microbiomes with occupancies higher than 0.01% in either WT or APP/PS1 mice were shown. The increase and decrease of the mean occupancy in APP/PS1 mice are indicated by ↑ and ↓, respectively.

### Length Distribution

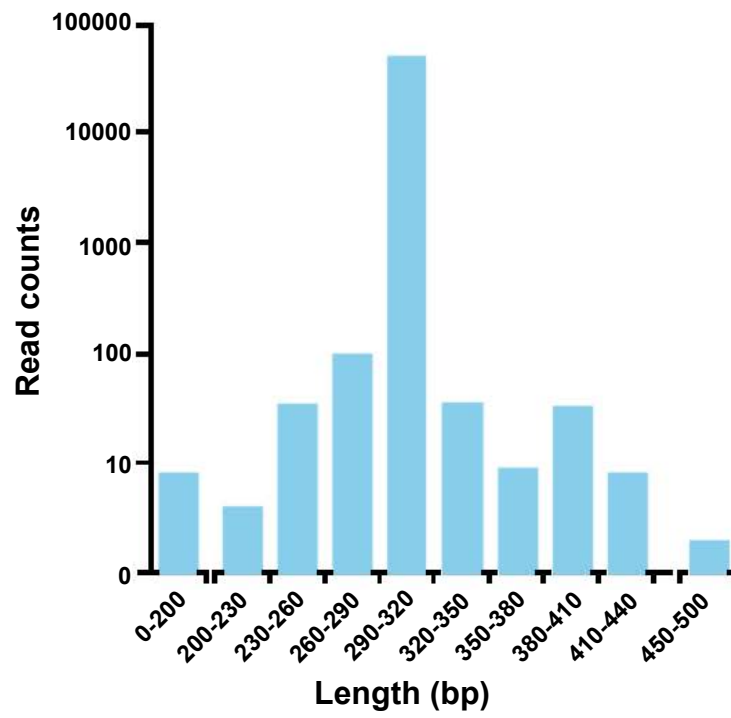

Figure S1. Length of sequence reads of all samples.

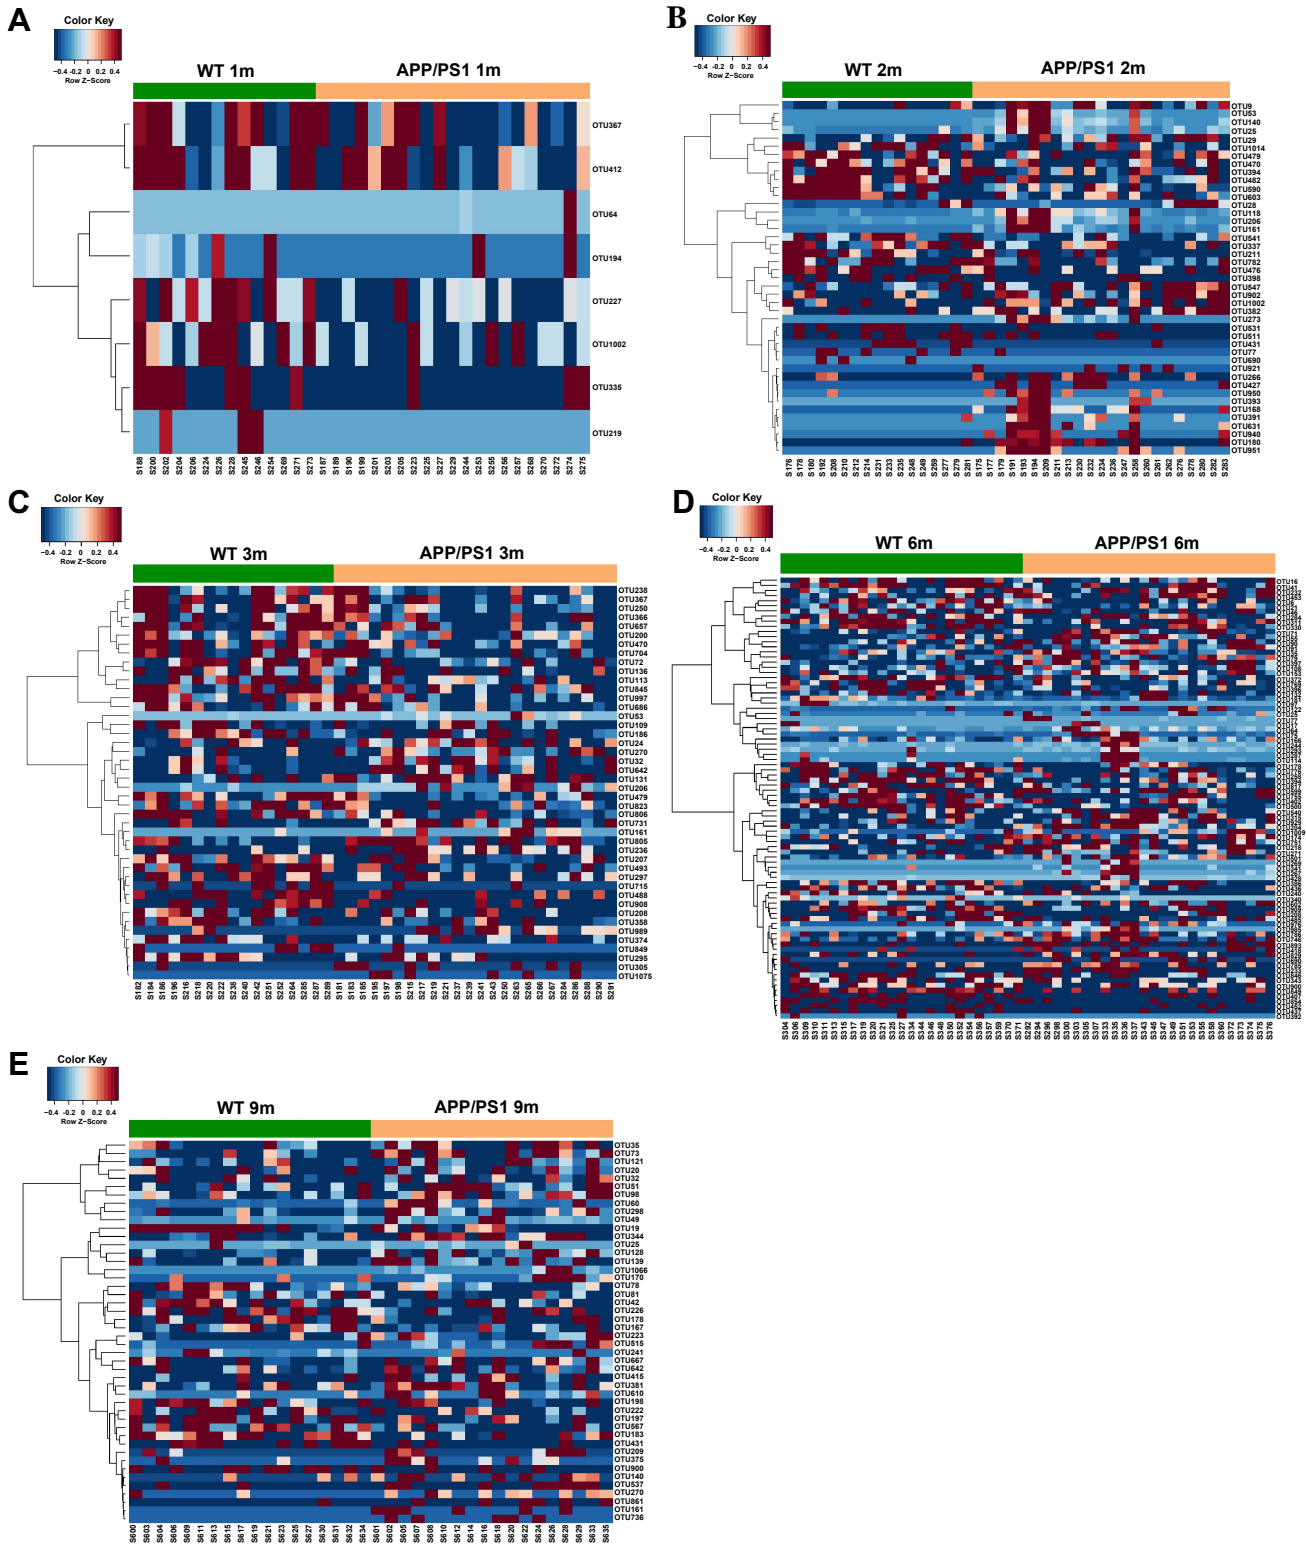

**Figure S2. (A–E)** Heatmaps showing the differentially abundant taxa at the OTU level in wild-type (WT) and APP/PS1 mice at 1, 2, 3, 6, and 9 months of age, respectively. Each column in the heatmap represents a mouse fecal sample, and each row represents an OTU-level taxon that is differentially abundant in WT or APP/PS1 mice. The 16S rRNA sequence-based cluster tree for the differential OTUs is presented on the left side of the heatmap. 1m, 2m, 3m, 6m, 9m indicate mice at 1, 2, 3, 6, and 9 months of age, respectively.

A

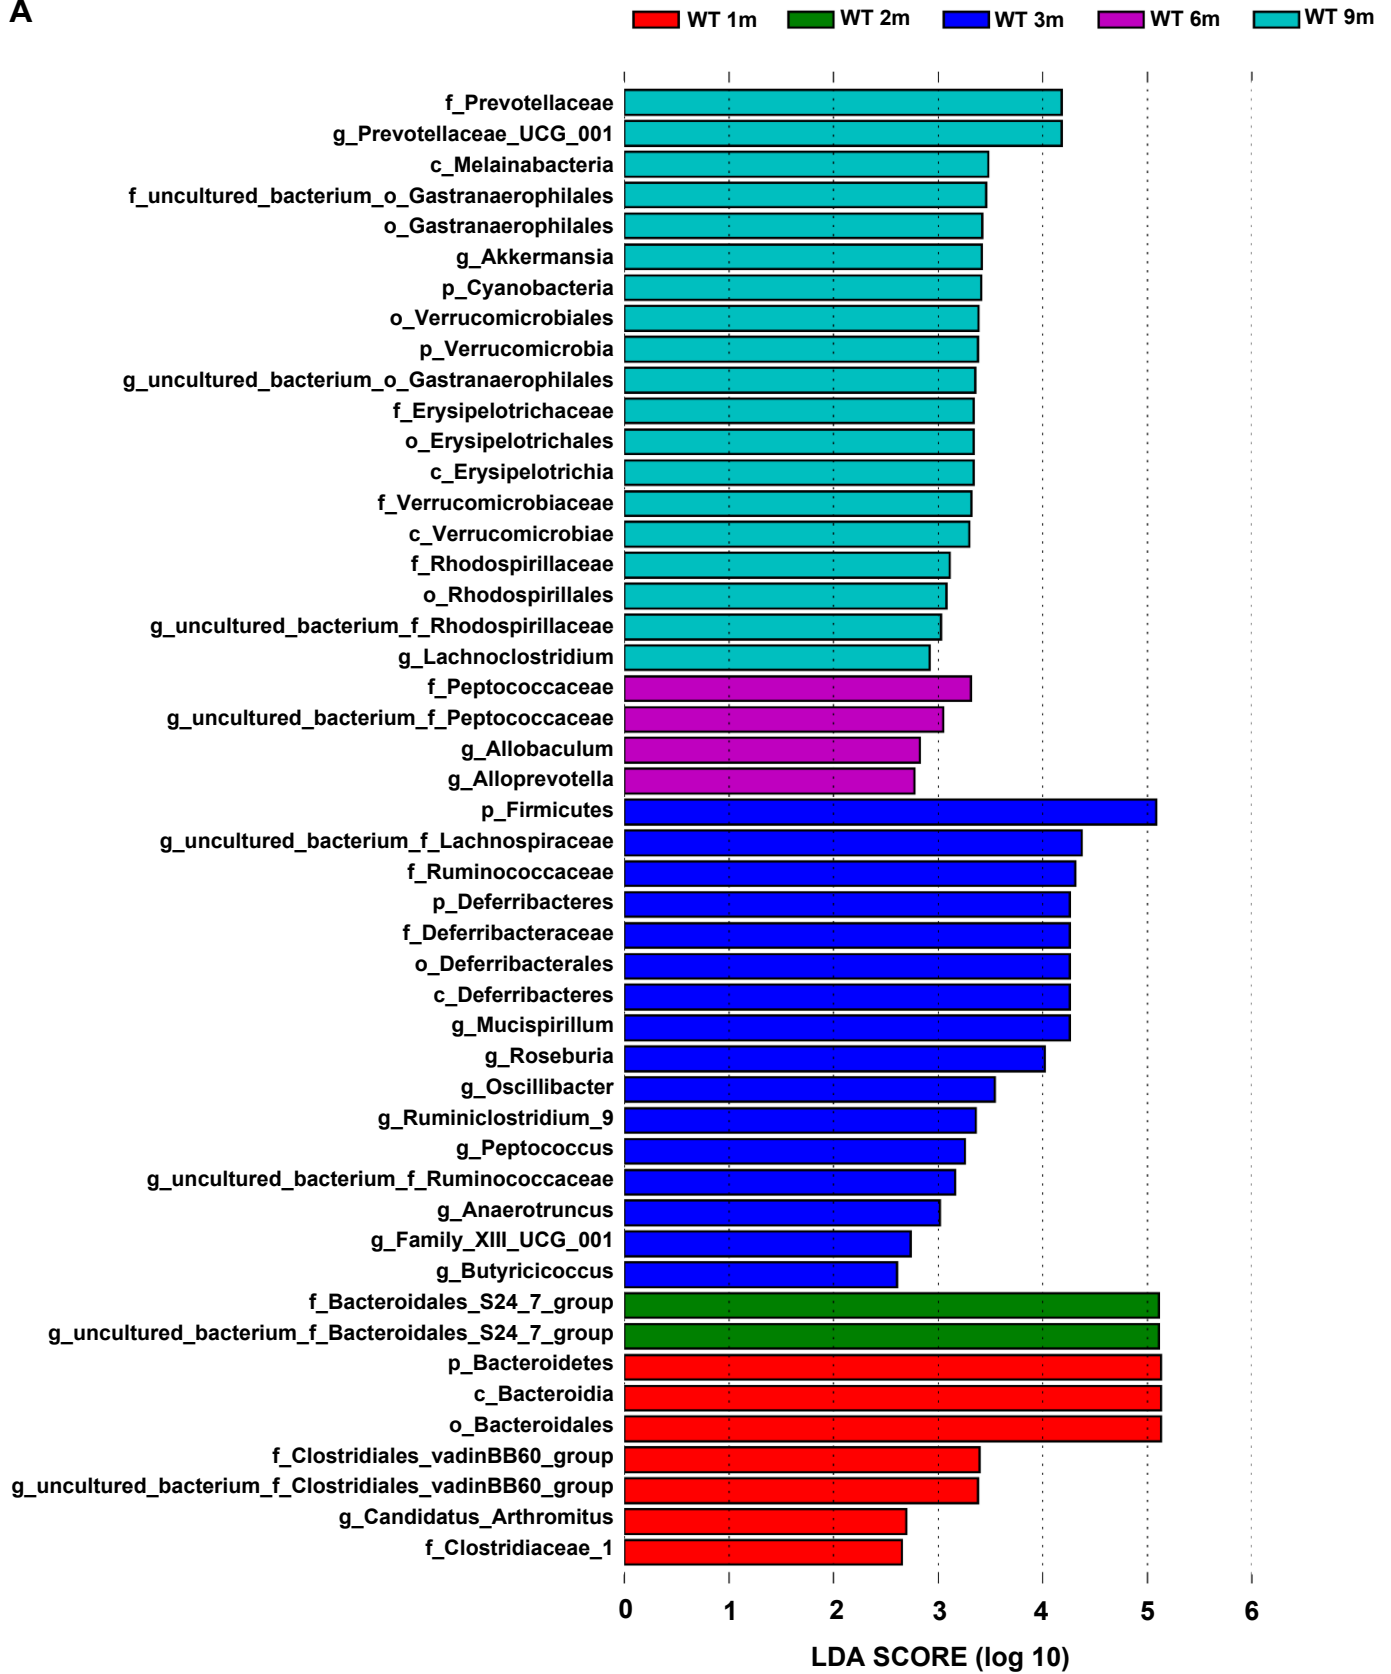



**B**

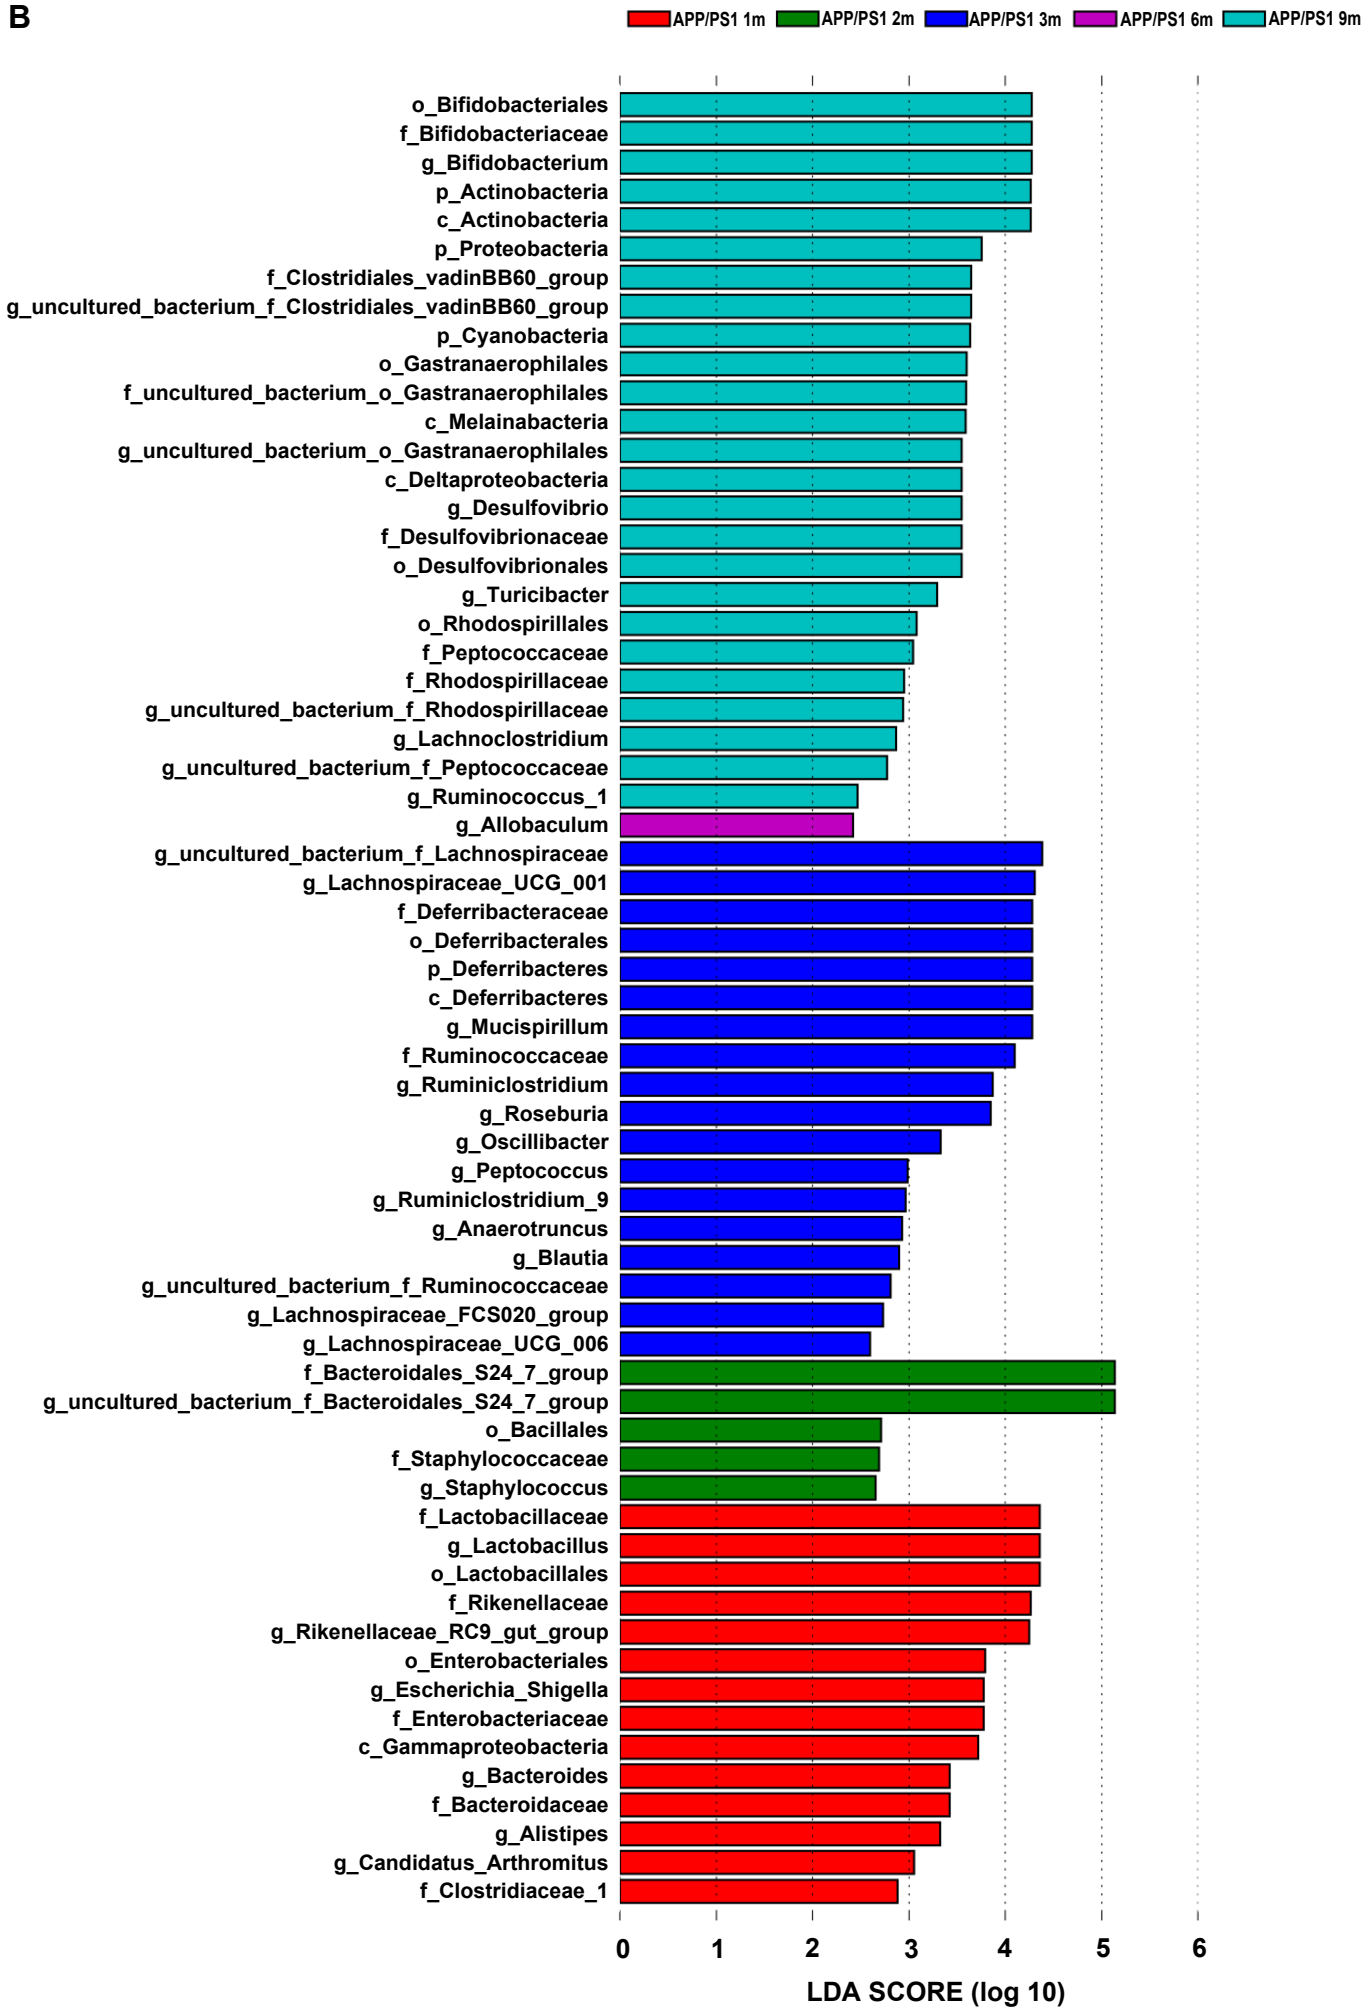

**Figure S3.** Differentially represented bacterial taxa of WT (A) and APP/PS1 (B) mice at different ages, as revealed by LfSe analysis. 1m, 2m, 3m, 6m, 9m indicate mice at 1, 2, 3, 6, and 9 months of age, respectively.
